1 **Draft Genome Sequence of *Modestobacter* sp. strain VKM Ac-2676 from soil in the area of**  
2 **sharply continental climate**

3

4

5 Oleg V. Vasilenko,<sup>a#</sup> Sergey V. Tarlachkov,<sup>a,b</sup> Irina P. Starodumova,<sup>a,c</sup> Elena V. Ariskina,<sup>a</sup> Kseniya  
6 I. Ariskina,<sup>d</sup> Alexander N. Avtukh,<sup>a</sup> Lyudmila V. Lysak,<sup>d</sup> Miroslav V. Telkov,<sup>e</sup> and Lyudmila I.  
7 Evtushenko<sup>a</sup>

8

9

10 All-Russian Collection of Microorganisms (VKM), G.K. Skryabin Institute of Biochemistry and  
11 Physiology of Microorganisms, Pushchino, Russia<sup>a</sup>; Branch of Shemyakin and Ovchinnikov  
12 Institute of Bioorganic Chemistry, Pushchino, Russia<sup>b</sup>; Pushchino State Institute of Natural  
13 Sciences, Pushchino, Russia<sup>c</sup>, Lomonosov Moscow State University, The Faculty of Soil  
14 Sciences, Dept of Soil Biology, Moscow, Russia<sup>d</sup>; N.F. Gamaleya Institute for Epidemiology  
15 and Microbiology, Moscow, Russia<sup>e</sup>

16

17 Running Head: Draft Genome of *Modestobacter* sp. VKM Ac-2676

18

19 <sup>#</sup>Address correspondence to Oleg V. Vasilenko, [ovvasilenko@ibpm.pushchino.ru](mailto:ovvasilenko@ibpm.pushchino.ru).

20

21

22 A draft genome sequence of a novel actinobacterium, *Modestobacter* sp. strain VKM Ac-  
23 2676, was derived using Ion Torrent sequencing technology. The genome size is 3.88 Mb with  
24 average G+C content of 73.40%. The genes encoding properties relevant to adaptability of  
25 this bacterium to a sharply continental climate zone were revealed.

26

27 The genus *Modestobacter* (family *Geodermatophilaceae*, phylum "Actinobacteria") includes  
28 six validly described species (LPSN; <http://www.bacterio.net>) (1). A seventh species has  
29 recently been proposed (2). The *Modestobacter* species are aerobic, non-spore-forming,  
30 heterotrophic, and able to grow on oligotrophic media. They form orange-red or pink colonies  
31 usually turning black with age (2, 3). Members of this genus occur in markedly different  
32 ecosystems, including extreme ones (2 - 6).

33

34 Strain VKM Ac-2676 was isolated from technogeneous soil collected near Orsk town  
35 (Southern Urals, Russia) located in a site characterized by dry and hot summers, with

36 temperatures up to +40°C, and cold winters, with temperatures down to -40°C. Based on the  
37 16S rRNA gene sequence analysis, VKM Ac-2676 is the closest to *M. versicolor* CP153-2<sup>T</sup>  
38 (99.52% sequence identity).

39

40 The genome sequencing was performed with a semiconductor genome analyzer Ion Torrent  
41 PGM<sup>TM</sup> (Thermo Fisher Scientific Inc., USA) using 400-bp sequencing kit and 318 v2 chip. A  
42 total of 539,682 raw reads were assembled *de novo* into 2,200 contigs (21.0-fold peak  
43 coverage) using Newbler 2.9 (454 Life Sciences Corporation, USA). Genomic contigs were  
44 annotated using the NCBI Prokaryotic Genomes Automatic Annotation Pipeline (PGAAP,  
45 version 3.3) ([https://www.ncbi.nlm.nih.gov/genome/annotation\\_prok](https://www.ncbi.nlm.nih.gov/genome/annotation_prok)). The genome size is  
46 3,884,161 bp with average G+C content of 73.40%. The N50 contig is 2,861 bp, largest contig  
47 is 22,534 bp. A total of 2,702 protein-encoding genes (1031 of which are hypothetical  
48 proteins), 45 tRNAs, 3 rRNAs and 3 ncRNAs were predicted.

49

50 WGS analysis revealed that VKM Ac-2676 harbors genes that encode properties relevant to  
51 the adaptability of target bacterium to a sharply continental climate. These include genes  
52 involved in the heat shock (*hrcA*, *dnaJ* and *dnaK*) and cold shock (Csp family) responses, and  
53 also in the trehalose biosynthesis, which play a crucial role in protecting cells against  
54 desiccation. The strain has also genes encoding carbon monoxide dehydrogenase (involved in  
55 chemolithotrophic metabolism allowing organisms to use CO as a carbon and energy source)  
56 (7) and a putative rhodopsin-like protein genes indicative of its probable photoheterotrophic  
57 lifestyle. The genome harbors a *recO* gene and four copies of *recQ* DNA helicase that play  
58 roles in maintaining genomic stability (8, 9). Strain VKM Ac-2676 also contains genes of  
59 multienzyme complex involved in UV resistance, such as *uvrA* and *uvrB*, like that reported  
60 for *M. marinus* (NC\_017955.1) and *M. caceresii* (NZ\_JPMX01000000) (2, 5). The protein  
61 sequence of *uvrC* gene of strain VKM Ac-2676 showed high similarity (~95%) to that of a  
62 relevant gene in *M. caceresii* 45-2b<sup>T</sup>, however PGAAP marks this gene as pseudogene.

63

64 VKM Ac-2676 formed a sister branch to *M. versicolor* in the *gyrB* gene tree with 92.90%  
65 sequence identity, that is in the range of similarities (84.91%–96.31%) found between other  
66 species of this genus. The above data suggest that strain VKM Ac-2676 represent a novel  
67 species of *Modestobacter*. The study of biochemical and physiological characteristics of this  
68 strain is in progress.

69

70 **Nucleotide sequence accession number(s).** This Whole Genome Shotgun project has been  
71 deposited at DDBJ/ENA/GenBank under the accession MBFF00000000. The version  
72 described in this paper is the first version, MBFF01000000.

73

74

#### 75 ACKNOWLEDGMENTS

76 Sequencing was performed at the Postgenomics Research Laboratory, SRI PCM FMBA of  
77 Russia. We are thankful to Dr. V.V. Babenko and Dr. E.S. Kostryukova for their kind  
78 assistance.

79

80

81 **Funding information.** This work was financially supported by the Russian Federal Agency  
82 of Scientific Organizations for fundamental studies at IBPM RAS (topic No. 01201350918).

83

84

#### 85 REFERENCES

86

87 1. **Trujillo M, Goodfellow M, Busarakam K, Riesco R.** 2015. *Modestobacter lapidis* sp.  
88 nov. and *Modestobacter muralis* sp. nov., isolated from a deteriorated sandstone historic  
89 building in Salamanca, Spain. *Antonie van Leeuwenhoek* **108**:311–320. doi:10.1007/s10482-  
90 015-0482-7.

91 2. **Busarakam K, Bull AT, Trujillo ME, Riesco R, Sangal V, van Wezel GP, Goodfellow**  
92 **M.** 2016. *Modestobacter caceresii* sp. nov., novel actinobacteria with an insight into their  
93 adaptive mechanisms for survival in extreme hyper-arid Atacama Desert soils. *Syst Appl*  
94 *Microbiol* **39**:243–251. doi:10.1016/j.syapm.2016.03.007.

95 3. **Normand P, Daffonchio D, Gtari M.** 2014. Family *Geodermatophilaceae*. In Rosenberg E  
96 (ed), *The Prokaryotes – Actinobacteria*. Springer-Verlag.

97 4. **Gtari M, Essoussi I, Maaoui R, Sghaier H, Boujmil R, Gury J, Pujic P, Brusetti L,**  
98 **Chouaia B, Crotti E, Daffonchio D, Boudabous A, Normand P.** 2012. Contrasted  
99 resistance of stone dwelling *Geodermatophilaceae* species to stresses known to give rise to  
100 reactive oxygen species. *FEMS Microbiol Ecol* **80**:566–577. doi:10.1111/j.1574-  
101 6941.2012.01320.x.

102 5. **Normand P, Gury J, Pujic P, Chouaia B, Crott E, Brusetti L, Daffon-chio D, Vacheri**  
103 **B, Barbe V, Medigie C, Calteau A, Ghodhbane-Gtari, Essoussi I, Nouioui I, Abbassi-**  
104 **Ghozzi I, Gtari M.** 2012. Genome sequence of radiation-resistant *Modestobacter marinus*

- 105 strain BC501, a representative actinobacterium that thrives on calcareous stone surfaces. *J*  
106 *Bacteriol* **194**:4773–4774. doi:10.1128/JB.01029-12.
- 107 6. **Urzi C, Brusetti P, Salamone C, Sorlini F, Stackebrandt E, Daffonchio D.** 2001.  
108 Biodiversity of *Geodermatophilaceae* isolated from altered stones and monuments in the  
109 Mediterranean basin. *Environ Microbiol* **3**:471–479. doi:10.1046/j.1462-2920.2001.00217.x.
- 110 7. **Lorite MJ, Tachil J, Sanjuan J, Meyer O, Bedmar EJ.** 2000. Carbon monoxide  
111 dehydrogenase activity in *Bradyrhizobium japonicum*. *Appl Environ Microbiol* **66**:1871–  
112 1876. doi:10.1128/AEM.66.5.1871-1876.2000.
- 113 8. **Hickson ID.** 2003. *RecQ* helicases: caretakers of the genome. *Nat Rev Cancer* **3**:169–178.  
114 doi:10.1038/nrc1012.
- 115 9. **Manthei KA, Hill MC, Burke JE, Butcher SE, Keck JL.** 2015. Structural mechanisms of  
116 DNA binding and unwinding in bacterial *RecQ* helicases. *Proc Natl Acad Sci U S A.*  
117 **112**:4292–4297. doi:10.1073/pnas.1416746112.
